# Supplementary material for: Formation and hydrogen release of hydrazine bisborane: transfer vs. attachment of a borane
Source: Royal Society of Chemistry journal article supplement (doi:10.1039/c0cp02484h), 2011-01-01
Supplement: c0cp02484h.pdf [file c0cp02484h.pdf]

## Formation and hydrogen release of hydrazine bisborane: Transfer vs. attachment of a borane

Vinh Son Nguyen<sup>a,b</sup> Saartje Swinnen,<sup>a</sup> Jerzy Leszczynski<sup>c</sup> and Minh Tho Nguyen<sup>\*,a,1</sup>

<sup>a</sup>*Department of Chemistry, University of Leuven, B-3001 Leuven, Belgium*

<sup>b</sup> *Department of Chemistry, Hanoi National University of Education, 136 XuanThuy Street, Hanoi, Vietnam*

<sup>c</sup> *Interdisciplinary Center for Nanotoxicity, Department of Chemistry, Jackson State University, Jackson, MS 39217, USA*

**Supporting Information Available.** Optimized geometries (Cartesian coordinates and figures with selected parameters). Table S-1 lists the reaction Enthalpies and Free Energies. Table S-2 lists the coordinates of all MP2/aVTZ optimized geometries. Figure S-1 shows the geometrical parameters of all 9 conformers optimized at the MP2/aVTZ. Figure S-2 illustrates the combination of IRC plots along with the total energy and B2–N4 and B4–H7 bond lengths. Figure S-3 displays geometrical parameters of all TSs for 1,2-H<sub>2</sub>, 1,3-H<sub>2</sub> eliminations and BH<sub>3</sub>-catalyzed H<sub>2</sub>-loss.

---

<sup>1</sup> [minh.nguyen@chem.kuleuven.be](mailto:minh.nguyen@chem.kuleuven.be)

**Table S-1:** Reaction Enthalpies at 0 K and 298 K and Gibbs Free Energies at 298 K of the reactants, adducts, transition states, and products in kcal mol<sup>-1</sup><sup>a</sup> and imaginary frequencies<sup>b</sup>

| Structures                                                                           | $\Delta H$<br>(0 K) | $\Delta H$<br>(298 K) | $\Delta G$<br>(298 K) | Transition frequency<br>(cm <sup>-1</sup> ) |
|--------------------------------------------------------------------------------------|---------------------|-----------------------|-----------------------|---------------------------------------------|
| B <sub>2</sub> H <sub>6</sub> + N <sub>2</sub> H <sub>4</sub><br><b>(db + hyz)</b>   | 0.0                 | 0.0                   | 0.0                   |                                             |
| 2BH <sub>3</sub> + N <sub>2</sub> H <sub>4</sub><br><b>(2b + hyz)</b>                | 36.4                | 38.3                  | 28.8                  |                                             |
| BH <sub>3</sub> + BH <sub>3</sub> N <sub>2</sub> H <sub>4</sub><br><b>(b + bhyz)</b> | 5.7                 | 6.2                   | 7.1                   |                                             |
| <b>dbhyz-com</b>                                                                     | -2.6                | -2.2                  | 4.7                   |                                             |
| <b>dbhyz-C</b>                                                                       | -8.1                | -8.7                  | 2.1                   |                                             |
| <b>dbhyz-T</b>                                                                       | -10.8               | -11.3                 | -0.3                  |                                             |
| <b>bhyzb</b>                                                                         | -23.8               | -24.7                 | -13.1                 |                                             |
| BH <sub>3</sub> + BH <sub>2</sub> N <sub>2</sub> H <sub>3</sub> + H <sub>2</sub>     | 0.9                 | 3.3                   | -4.8                  |                                             |
| <b>Prod-dbhyz-TS2</b> + H <sub>2</sub>                                               | -17.1               | -16.1                 | -13.0                 |                                             |
| <b>Prod-dbhyz-TS3</b> + H <sub>2</sub>                                               | 2.9                 | 3.8                   | 6.9                   |                                             |
| <b>Prod-bhyzb-TS1</b> + H <sub>2</sub>                                               | -28.3               | -27.3                 | -25.1                 |                                             |
| <b>Prod-bhyzb-TS2</b> + H <sub>2</sub>                                               | -17.4               | -16.9                 | -12.8                 |                                             |
| <b>dbhyz-com-ts</b>                                                                  | 2.7                 | 2.0                   | 12.9                  | 315 <i>i</i>                                |
| <b>TS-dbhyz-T-C</b>                                                                  | 1.6                 | 1.3                   | 11.1                  | 389 <i>i</i>                                |
| <b>TS-dbhyz-bhyzb</b>                                                                | 3.6                 | 3.5                   | 13.1                  | 163 <i>i</i>                                |
| <b>dbhyz-C-TS1</b>                                                                   | 15.9                | 15.1                  | 26.5                  | 713 <i>i</i>                                |
| <b>dbhyz-C-TS2</b>                                                                   | 36.6                | 36.0                  | 46.8                  | 1363 <i>i</i>                               |
| <b>dbhyz-C-TS3</b>                                                                   | 50.4                | 49.2                  | 61.6                  | 1038 <i>i</i>                               |
| <b>dbhyz-T-TS1</b>                                                                   | 13.6                | 12.9                  | 24.2                  | 813 <i>i</i>                                |
| <b>dbhyz-T-TS2</b>                                                                   | 35.8                | 35.1                  | 46.4                  | 1384 <i>i</i>                               |
| <b>dbhyz-T-TS3</b>                                                                   | 49.5                | 48.4                  | 60.4                  | 765 <i>i</i>                                |
| <b>bhyzb-TS1</b>                                                                     | 17.8                | 16.7                  | 28.6                  | 1483 <i>i</i>                               |
| <b>bhyzb-TS2</b>                                                                     | 18.6                | 17.4                  | 29.8                  | 239 <i>i</i>                                |

<sup>a</sup> Relative values obtained from CCSD(T)/aVTZ total energies

<sup>b</sup> Vibrational frequency modes were obtained from MP2/aVDZ calculations.

**Table S-2:** Geometries of the Structures Considered Optimized at the MP2/aug-cc-pVTZ Level of Theory, Given in Cartesian Coordinates (Å)

**1. bhyz**

|   |           |           |           |
|---|-----------|-----------|-----------|
| N | 0.042692  | 0.548716  | 0.002598  |
| H | 0.074294  | 1.098623  | 0.856840  |
| N | 1.191725  | -0.308406 | -0.125800 |
| H | 1.939858  | 0.046268  | 0.458858  |
| H | 0.054408  | 1.189569  | -0.784396 |
| H | 0.893111  | -1.202276 | 0.251724  |
| H | -2.216569 | 0.547128  | 0.099930  |
| B | -1.353843 | -0.292497 | 0.005938  |
| H | -1.254562 | -1.000060 | 0.984365  |
| H | -1.362250 | -0.898934 | -1.034599 |

**2. dbhyz-com**

|   |           |           |           |
|---|-----------|-----------|-----------|
| N | -1.346757 | 0.758156  | 0.066974  |
| N | -2.044050 | -0.456222 | -0.246228 |
| B | 1.310994  | -0.740879 | 0.208880  |
| B | 2.580186  | 0.396781  | -0.159348 |
| H | 2.957337  | 0.499368  | -1.278856 |
| H | -1.425540 | 0.991266  | 1.051185  |
| H | 1.277545  | 0.518585  | -0.141739 |
| H | 3.040632  | 1.044683  | 0.721191  |
| H | 2.622297  | -0.864891 | 0.181742  |
| H | -1.790314 | 1.499105  | -0.459204 |
| H | 0.946220  | -0.850970 | 1.332820  |
| H | 0.857302  | -1.401852 | -0.666029 |
| H | -2.818592 | -0.612778 | 0.388658  |
| H | -1.387141 | -1.215561 | -0.122647 |

**3. dbhyz-C**

|   |           |           |           |
|---|-----------|-----------|-----------|
| N | 0.718160  | 0.277099  | 0.503882  |
| B | -0.461642 | 0.939662  | -0.350483 |
| N | 1.519640  | -0.632254 | -0.267148 |
| B | -2.043907 | -0.584586 | 0.047882  |
| H | -0.999418 | 1.757673  | 0.326269  |
| H | 1.268457  | 1.023514  | 0.924970  |
| H | -1.135595 | -0.028548 | -0.796609 |
| H | 0.036202  | 1.341907  | -1.371136 |
| H | -1.614067 | -0.633032 | 1.174555  |
| H | 0.265472  | -0.261199 | 1.242687  |
| H | -3.038954 | 0.061204  | -0.090838 |
| H | -1.988578 | -1.625462 | -0.549004 |
| H | 2.429200  | -0.730389 | 0.169454  |
| H | 1.640434  | -0.194964 | -1.174483 |

**4. dbhyz-T**

|   |           |           |           |
|---|-----------|-----------|-----------|
| N | 0.678167  | 0.322231  | 0.495546  |
| B | -0.418008 | 1.076359  | -0.368546 |
| N | 1.485861  | -0.679014 | -0.179353 |
| B | -1.838397 | -0.634515 | 0.059993  |
| H | -0.885734 | 1.968957  | 0.269125  |
| H | -1.854995 | -0.217693 | 1.185534  |
| H | 0.100099  | 1.376532  | -1.412025 |
| H | -1.289042 | 0.250837  | -0.791917 |
| H | 0.221740  | -0.151555 | 1.276270  |
| H | 1.330512  | 0.989967  | 0.899960  |
| H | -1.132461 | -1.598276 | -0.120870 |
| H | -2.899024 | -0.675237 | -0.490189 |
| H | 1.726745  | -0.246772 | -1.068510 |
| H | 0.815990  | -1.408499 | -0.417959 |

**5. bhyzb**

|   |           |           |           |
|---|-----------|-----------|-----------|
| N | 0.517885  | -0.503602 | 0.000000  |
| B | 2.004934  | 0.143694  | 0.000000  |
| N | -0.517889 | 0.503614  | 0.000000  |
| B | -2.004933 | -0.143705 | 0.000000  |
| H | 2.028453  | 0.805951  | -1.012538 |
| H | 0.321362  | -1.087562 | -0.813558 |
| H | 2.761831  | -0.791343 | 0.000000  |
| H | 2.028454  | 0.805951  | 1.012537  |
| H | -2.028439 | -0.805961 | -1.012537 |
| H | 0.321362  | -1.087562 | 0.813558  |
| H | -2.028439 | -0.805961 | 1.012538  |
| H | -2.761846 | 0.791319  | 0.000000  |
| H | -0.321359 | 1.087570  | 0.813559  |
| H | -0.321359 | 1.087570  | -0.813559 |

**6. BH<sub>2</sub>N<sub>2</sub>H<sub>3</sub>**

|   |           |           |           |
|---|-----------|-----------|-----------|
| N | 0.120974  | -0.438349 | -0.000004 |
| N | -1.206605 | 0.080892  | -0.000057 |
| B | 1.306936  | 0.288030  | 0.000028  |
| H | 2.328224  | -0.323245 | -0.000013 |
| H | 0.104708  | -1.445011 | -0.000121 |
| H | 1.247127  | 1.478488  | 0.000083  |
| H | -1.307489 | 0.676247  | -0.813325 |
| H | -1.307834 | 0.675571  | 0.813664  |

### 7. Prod-dbhyz-TS2

|   |           |           |           |
|---|-----------|-----------|-----------|
| N | 0.791075  | 0.613598  | -0.000118 |
| B | -0.612696 | 0.789983  | -0.000055 |
| B | -1.759474 | -0.581066 | 0.000173  |
| N | 1.478245  | -0.625078 | -0.000018 |
| H | -1.053207 | 1.891249  | -0.000157 |
| H | -1.248801 | 0.045091  | 0.981148  |
| H | -1.248917 | 0.044862  | -0.981010 |
| H | 1.422775  | 1.393627  | -0.000259 |
| H | -1.350598 | -1.696674 | 0.000278  |
| H | -2.917949 | -0.327163 | 0.000211  |
| H | 1.186081  | -1.157717 | -0.812741 |
| H | 1.186231  | -1.157503 | 0.812899  |

### 9. Prod-bhyzb-TS1

|   |           |           |           |
|---|-----------|-----------|-----------|
| N | 0.456028  | 0.529917  | -0.001549 |
| N | -0.650443 | -0.368202 | -0.001638 |
| B | -1.988026 | 0.019249  | 0.001626  |
| B | 1.885230  | -0.257950 | 0.001959  |
| H | 1.856903  | -0.914548 | 1.015023  |
| H | 0.391328  | 1.126632  | 0.818699  |
| H | 2.716722  | 0.615182  | 0.000424  |
| H | 1.858705  | -0.919544 | -1.007988 |
| H | 0.394038  | 1.123847  | -0.824044 |
| H | -2.232742 | 1.184605  | 0.004416  |
| H | -2.806698 | -0.838238 | 0.001472  |
| H | -0.303379 | -1.316432 | -0.003614 |

### 11. dbhyz-com-ts

|   |           |           |           |
|---|-----------|-----------|-----------|
| N | 0.909384  | -0.619531 | -0.012216 |
| N | 2.002836  | 0.296934  | -0.100369 |
| B | -0.788659 | 0.560418  | -0.030221 |
| B | -2.477413 | -0.154054 | 0.026140  |
| H | -2.995336 | -0.497408 | -0.990110 |
| H | -2.913581 | -0.491255 | 1.082515  |
| H | -0.447831 | 1.040322  | 1.007570  |
| H | -1.302693 | -0.664471 | -0.026913 |
| H | -2.237549 | 1.058319  | 0.009605  |
| H | -0.489365 | 1.033470  | -1.078331 |
| H | 0.919121  | -1.157932 | 0.849099  |
| H | 0.971185  | -1.257482 | -0.797415 |
| H | 1.665430  | 1.177009  | 0.276268  |
| H | 2.775435  | -0.014214 | 0.476210  |

### 13. TS-dbhyz-bhyzb

|   |           |           |           |
|---|-----------|-----------|-----------|
| N | 0.855216  | -0.132592 | 0.521364  |
| N | 0.338707  | -1.173643 | -0.320894 |
| B | 0.970268  | 1.262765  | -0.304871 |
| B | -2.436310 | 0.214758  | 0.061948  |
| H | 1.362923  | 2.075660  | 0.495024  |
| H | 1.768048  | -0.361744 | 0.907231  |

### 8. Prod-dbhyz-TS3

|   |           |           |           |
|---|-----------|-----------|-----------|
| N | 0.743656  | 0.751044  | 0.161185  |
| N | 1.178398  | -0.521731 | -0.471307 |
| B | 0.113849  | -0.590056 | 0.596184  |
| B | -1.905587 | 0.097291  | -0.159818 |
| H | -2.805373 | -0.681935 | -0.275846 |
| H | 0.179872  | 1.364859  | -0.415391 |
| H | -1.992776 | 0.887301  | 0.735270  |
| H | -1.436937 | 0.503911  | -1.197267 |
| H | -1.044845 | -0.884172 | 0.207675  |
| H | 1.502366  | 1.190821  | 0.661050  |
| H | 0.325844  | -1.019631 | 1.679303  |
| H | 0.776159  | -0.502523 | -1.405777 |

### 10. Prod-bhyzb-TS2

|   |           |           |           |
|---|-----------|-----------|-----------|
| N | -0.158548 | -0.198562 | -0.468145 |
| B | -1.636047 | -0.091226 | 0.161215  |
| N | 0.744307  | 0.790983  | 0.142443  |
| B | 1.117426  | -0.761596 | 0.192825  |
| H | -1.429279 | -0.031217 | 1.356717  |
| H | -2.219520 | -1.087340 | -0.181410 |
| H | -2.100438 | 0.936137  | -0.287723 |
| H | 2.006948  | -1.032439 | -0.548283 |
| H | -0.122489 | -0.084255 | -1.475484 |
| H | 0.968314  | -1.253250 | 1.258472  |
| H | 0.230959  | 1.230566  | 0.901330  |
| H | 1.158299  | 1.438959  | -0.513898 |

### 12. TS-dbhyz-T-C

|   |           |           |           |
|---|-----------|-----------|-----------|
| N | 0.723797  | -0.144691 | 0.500407  |
| N | 1.799500  | -0.380854 | -0.425286 |
| B | -0.311722 | 0.972008  | -0.041480 |
| B | -2.529704 | -0.447690 | -0.139547 |
| H | -1.146376 | 1.071676  | 0.825878  |
| H | 1.064082  | 0.147682  | 1.413109  |
| H | -1.817305 | -1.344414 | 0.207996  |
| H | 0.337075  | 1.981896  | -0.171587 |
| H | -0.723639 | 0.547013  | -1.091321 |
| H | 0.218788  | -1.020157 | 0.613826  |
| H | -2.797038 | -0.341790 | -1.290526 |
| H | -3.178175 | 0.117192  | 0.678748  |
| H | 2.641878  | -0.607278 | 0.091222  |
| H | 1.944754  | 0.505398  | -0.898063 |

### 14. dbhyz-C-TS1

|   |           |           |           |
|---|-----------|-----------|-----------|
| N | 0.623731  | 0.223085  | 0.470692  |
| N | 1.467460  | -0.624506 | -0.313978 |
| B | -0.220816 | 1.209884  | -0.251669 |
| B | -1.930440 | -0.572352 | -0.130713 |
| H | -0.550319 | 2.146619  | 0.411351  |
| H | 1.066202  | 0.574491  | 1.312410  |

H -0.146522 1.470613 -0.714040  
H 1.765824 1.011474 -1.183291  
H -1.926591 0.167491 1.139558  
H 0.199283 -0.014753 1.288890  
H -2.702875 1.269056 -0.408824  
H -2.750504 -0.792494 -0.479742  
H 0.668563 -2.075481 0.005028  
H 0.734599 -0.993788 -1.238510

**15. dbhыз-C-TS2**

N 0.568607 -0.284074 0.293735  
N 1.909079 -0.300938 -0.181041  
B -0.382239 0.851931 -0.131116  
B -2.200147 -0.425529 -0.102914  
H -0.597136 1.464057 1.045978  
H -0.006722 0.705278 1.159891  
H -1.537928 0.687035 -0.575281  
H 0.113763 1.694149 -0.811253  
H -1.897296 -0.652094 1.033742  
H 0.170606 -1.210612 0.310415  
H -3.256416 0.115016 -0.256034  
H -1.862771 -1.234602 -0.919359  
H 2.491900 0.214672 0.466674  
H 1.950123 0.180176 -1.073482

**17. dbhыз-T-TS1**

N -0.598155 0.151485 0.490059  
N -1.665848 -0.573685 -0.131629  
B 0.144936 1.196489 -0.238873  
B 2.058166 -0.463536 -0.069108  
H -0.166457 1.380238 -1.375683  
H 0.600358 -0.786445 0.370099  
H 1.134714 -1.422882 0.050267  
H 0.677854 2.032264 0.413459  
H 1.491176 0.376428 -0.782227  
H -0.825703 0.322850 1.458716  
H 2.348898 -0.067228 1.016493  
H 2.859886 -1.113786 -0.670907  
H -1.275011 -1.416249 -0.545927  
H -2.013200 -0.014553 -0.903400

**19. dbhыз-T-TS3**

N -0.610590 -0.527325 0.093814  
N -1.884103 0.167700 -0.019325  
B 0.578173 0.439740 0.361779  
B 2.151529 -0.157145 -0.206194  
H 3.157648 0.366852 0.134456  
H -0.384972 -1.110312 -0.716814  
H 1.534840 -0.487574 0.844409  
H 2.116446 -1.029597 -1.014324  
H 1.384811 0.788671 -0.632492

H -1.698032 0.644687 -0.195133  
H -0.116266 1.289155 -1.431620  
H -1.465066 -0.897785 1.079919  
H -0.699613 -0.578612 0.799573  
H -3.081140 -0.779552 0.115505  
H -1.388384 -1.227975 -0.960385  
H 1.736228 -1.423868 0.247481  
H 2.314330 -0.124868 -0.564191

**16. dbhыз-C-TS3**

N -0.768118 0.472785 -0.418948  
N -1.356017 -0.756368 0.108767  
B 0.638858 0.685699 0.222796  
B 1.868244 -0.541505 -0.130582  
H 0.977999 1.776153 0.529699  
H -1.326248 1.298257 -0.188522  
H 1.117769 -0.321007 0.910764  
H -0.431688 0.423802 1.818625  
H 1.479134 0.403696 -0.877805  
H -0.699592 0.409636 -1.432718  
H 2.979264 -0.283764 0.194621  
H 1.532023 -1.591720 -0.560113  
H -2.357558 -0.656774 -0.066844  
H -0.937671 -0.194172 1.382489

**18. dbhыз-T-TS2**

N 0.583047 -0.211412 -0.414620  
N 1.843845 -0.119601 0.234925  
B -0.441948 0.809144 0.149000  
B -2.146643 -0.465980 0.111787  
H -0.296231 1.304009 1.214823  
H 0.204613 -1.142542 -0.543606  
H -1.567615 -0.849133 1.090240  
H -0.176851 1.823589 -0.728187  
H -1.605089 0.712452 -0.315205  
H 0.293822 1.026383 -1.003667  
H -2.004526 -1.122197 -0.882704  
H -3.222667 0.018020 0.301847  
H 2.533478 -0.603354 -0.325861  
H 1.795773 -0.565955 1.146252

**20. bhyzb-TS1**

N -0.676149 -0.610321 0.256645  
B -1.609453 0.684871 -0.122599  
N 0.626941 -0.586534 -0.320977  
B 1.634358 0.535317 0.240042  
H -1.083582 1.642200 0.378365  
H -0.600730 -0.698775 1.271162  
H -2.676417 0.401903 0.368223  
H -1.608764 0.692151 -1.330906  
H 1.394213 1.423277 -0.691053

|   |           |           |           |   |           |           |           |
|---|-----------|-----------|-----------|---|-----------|-----------|-----------|
| H | -0.642676 | -1.157983 | 0.897887  | H | -1.170602 | -1.423047 | -0.100627 |
| H | -0.314439 | 1.694020  | -0.827845 | H | 1.297229  | 1.023977  | 1.272333  |
| H | 0.486100  | 1.216423  | 1.242936  | H | 2.750315  | 0.161222  | 0.058281  |
| H | -2.476840 | -0.479665 | -0.539982 | H | 1.028703  | -1.505323 | -0.429360 |
| H | -1.046575 | 1.303566  | -0.687586 | H | 0.889561  | 0.559469  | -0.933312 |

**21. bhyzb-TS2**

|   |           |           |           |
|---|-----------|-----------|-----------|
| N | -0.511106 | 0.546118  | -0.176052 |
| B | -1.969963 | -0.057590 | 0.063023  |
| N | 0.426831  | -0.564059 | -0.081888 |
| B | 1.842048  | -0.001852 | 0.187201  |
| H | -2.218714 | -0.771698 | -0.892121 |
| H | 1.255603  | 1.277100  | -0.465476 |
| H | -2.732574 | 0.867728  | 0.191246  |
| H | -1.872159 | -0.735992 | 1.092803  |
| H | 1.961398  | 0.426984  | 1.286898  |
| H | -0.333119 | 1.058982  | 0.691271  |
| H | 2.761960  | -0.540256 | -0.341694 |
| H | 1.998801  | 1.112637  | -0.710831 |
| H | 0.317744  | -1.074751 | -0.956748 |
| H | 0.090560  | -1.197935 | 0.659114  |

**Fig. S-1.** The LUMOs and HOMOs of  $\text{BH}_3$ ,  $\text{BH}_3\text{N}_2\text{H}_4$  and **TS-dbhyz-bhyzb**.

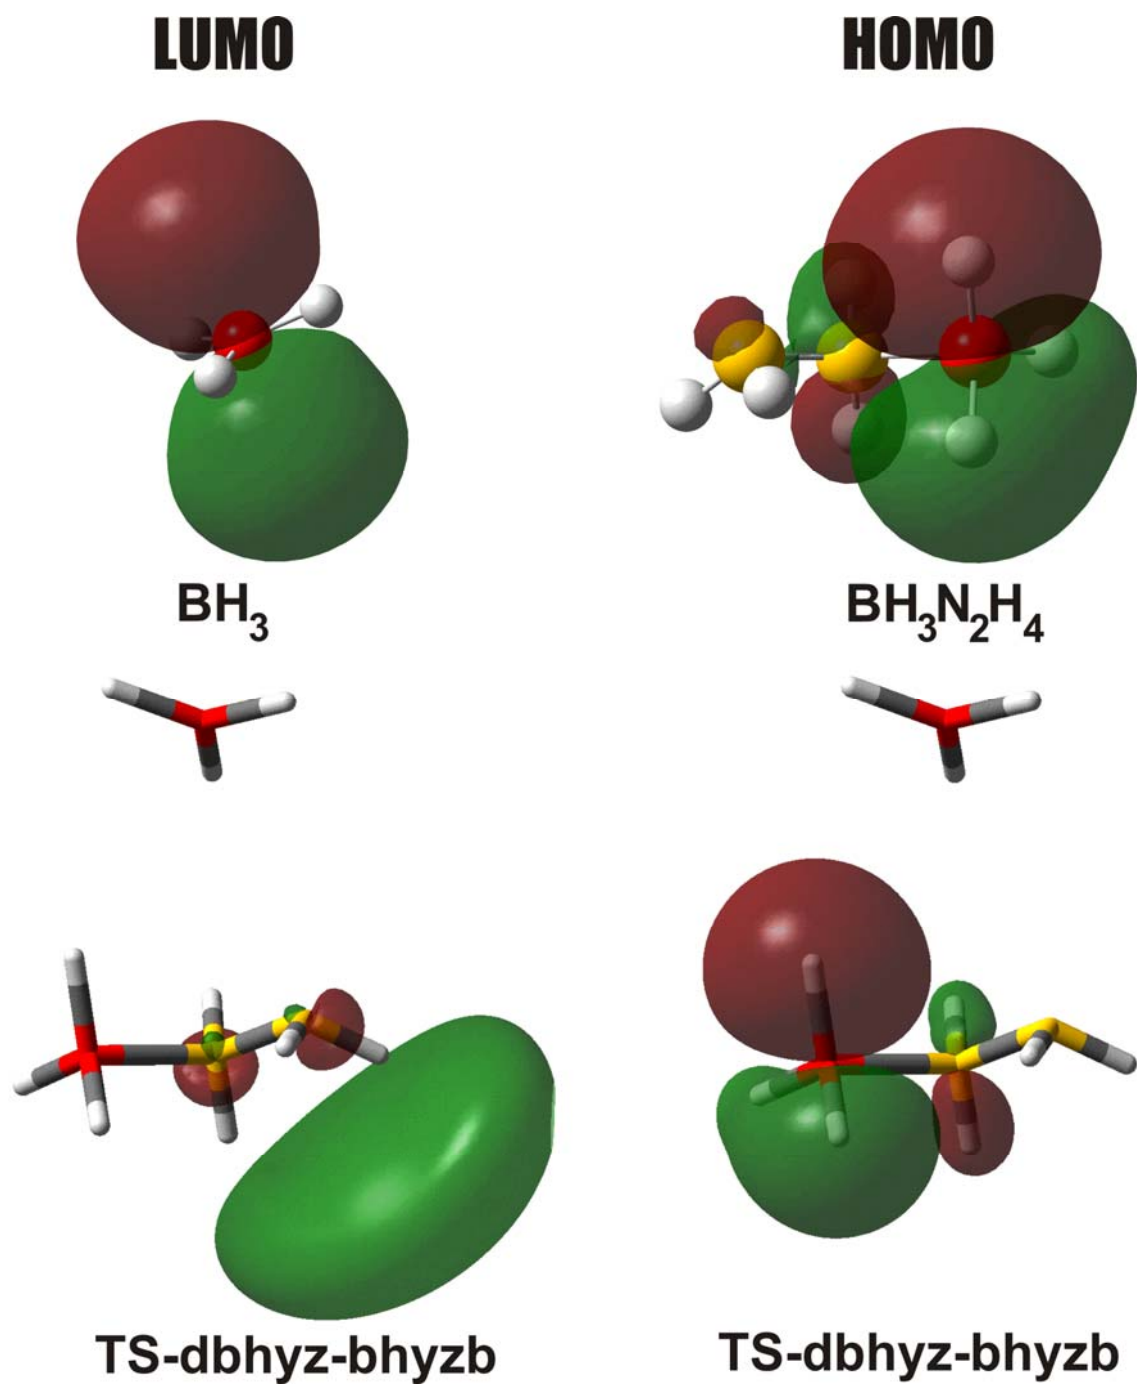

**Figure S-2.** Selected MP2/aVTZ geometry parameters of 9 conformers. Bond distances in angstroms and bond angles in degrees.

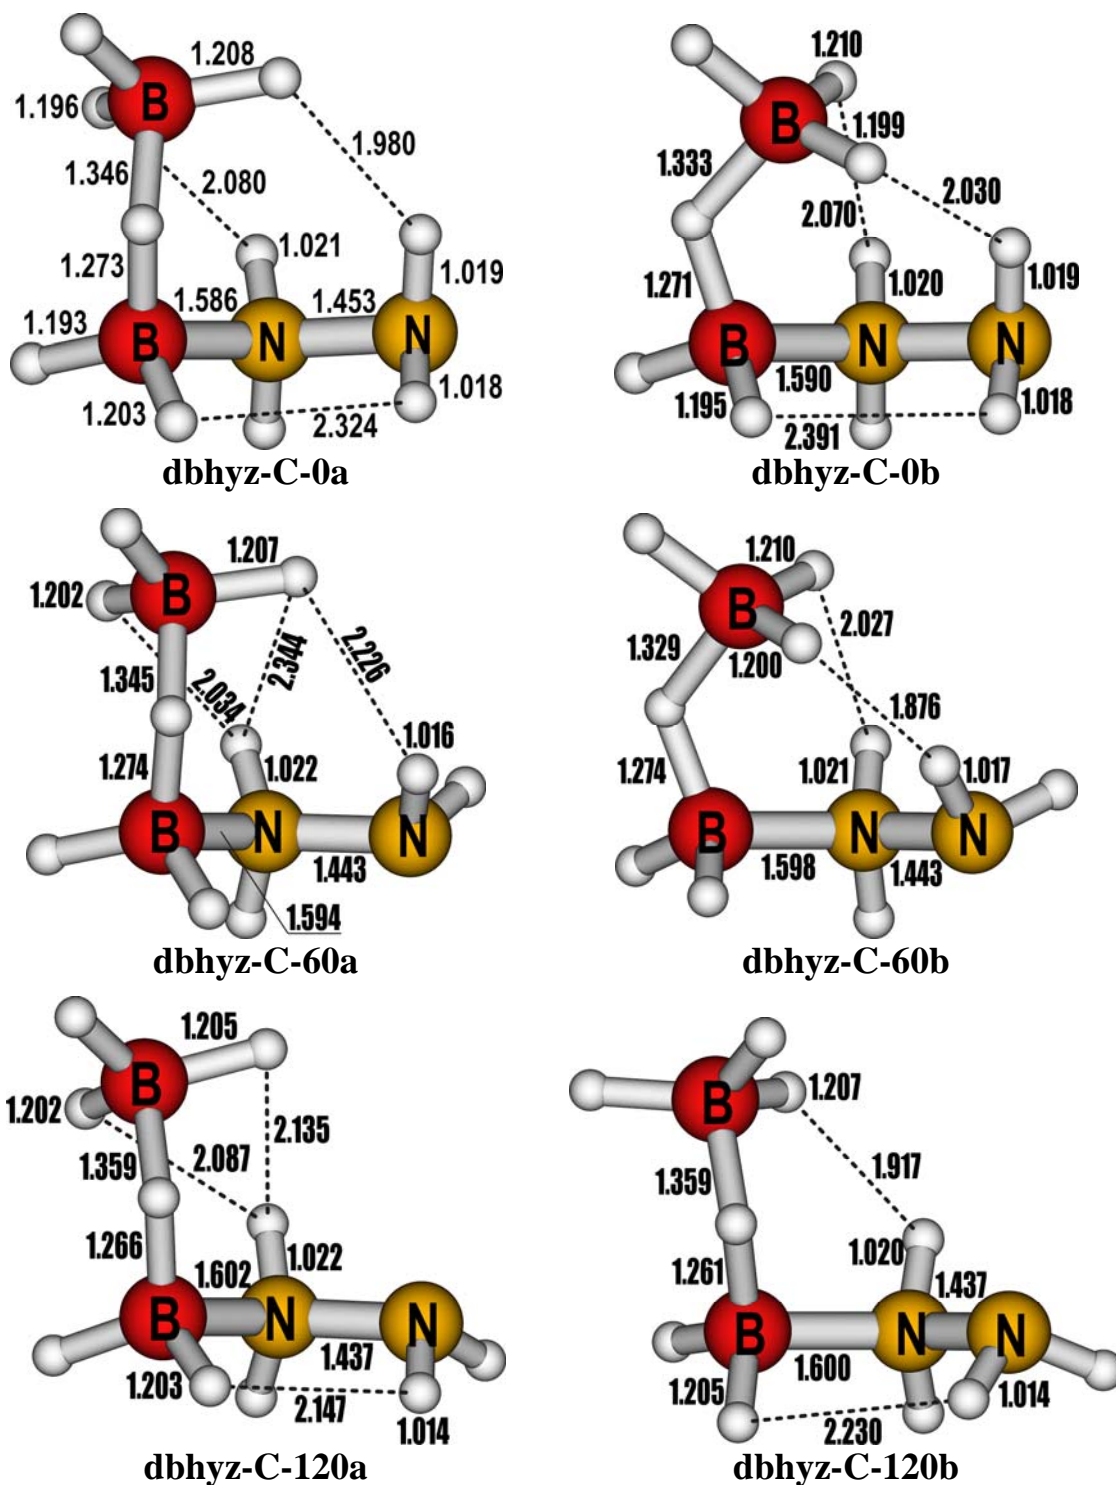



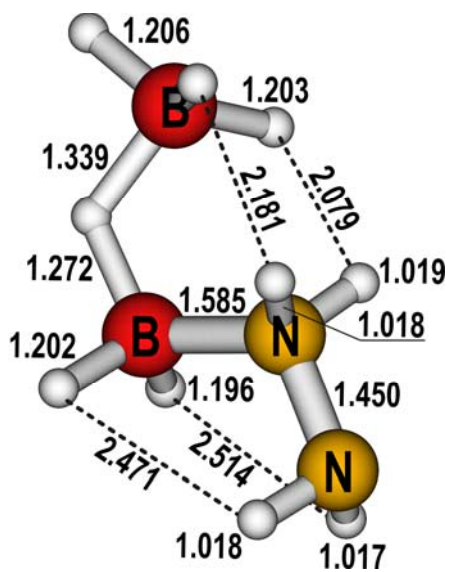

dbhyz-T-0

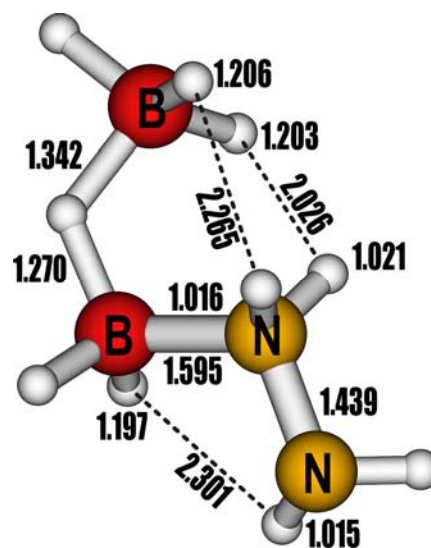

dbhyz-T-60

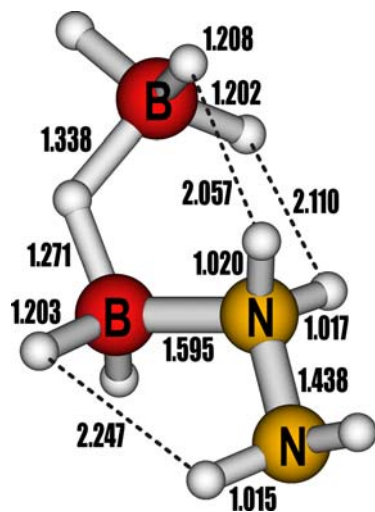

dbhyz-T-120

**Figure S-3.** Combination of IRC plots along with the total energy and B2–N4 and B4–H7 bond lengths

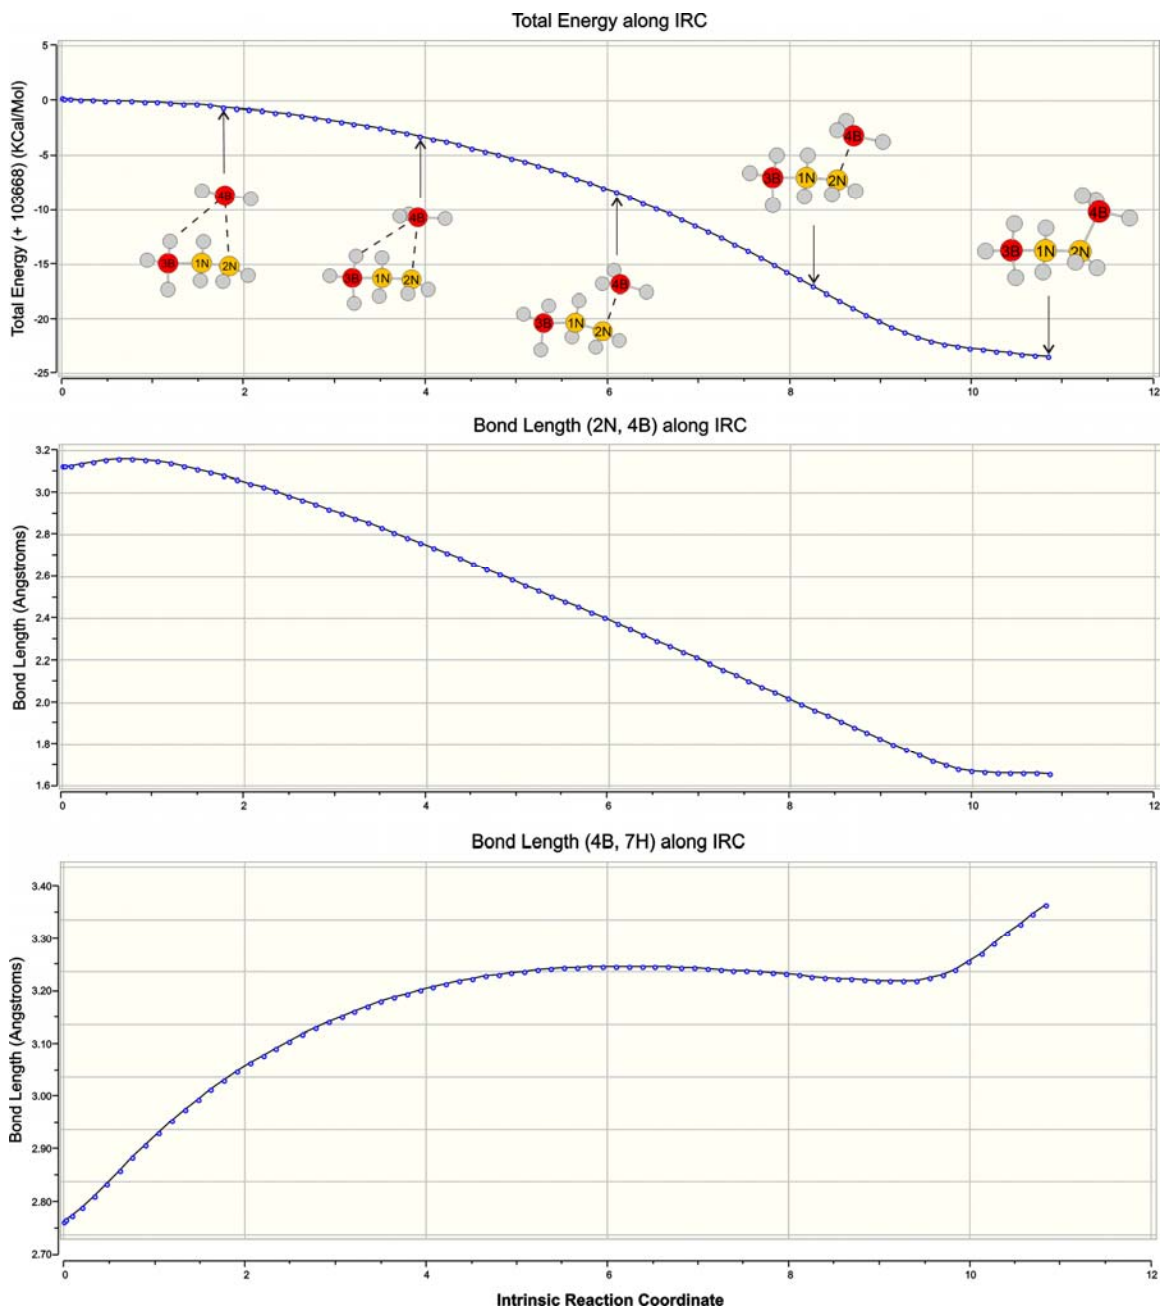

**Figure S-4.** Selected MP2/aVTZ geometrical parameters of all TSs for 1,2-H<sub>2</sub>, 1,3-H<sub>2</sub> eliminations and BH<sub>3</sub>-catalyzed H<sub>2</sub>-loss. Bond distances in angstroms and bond angles in degrees.

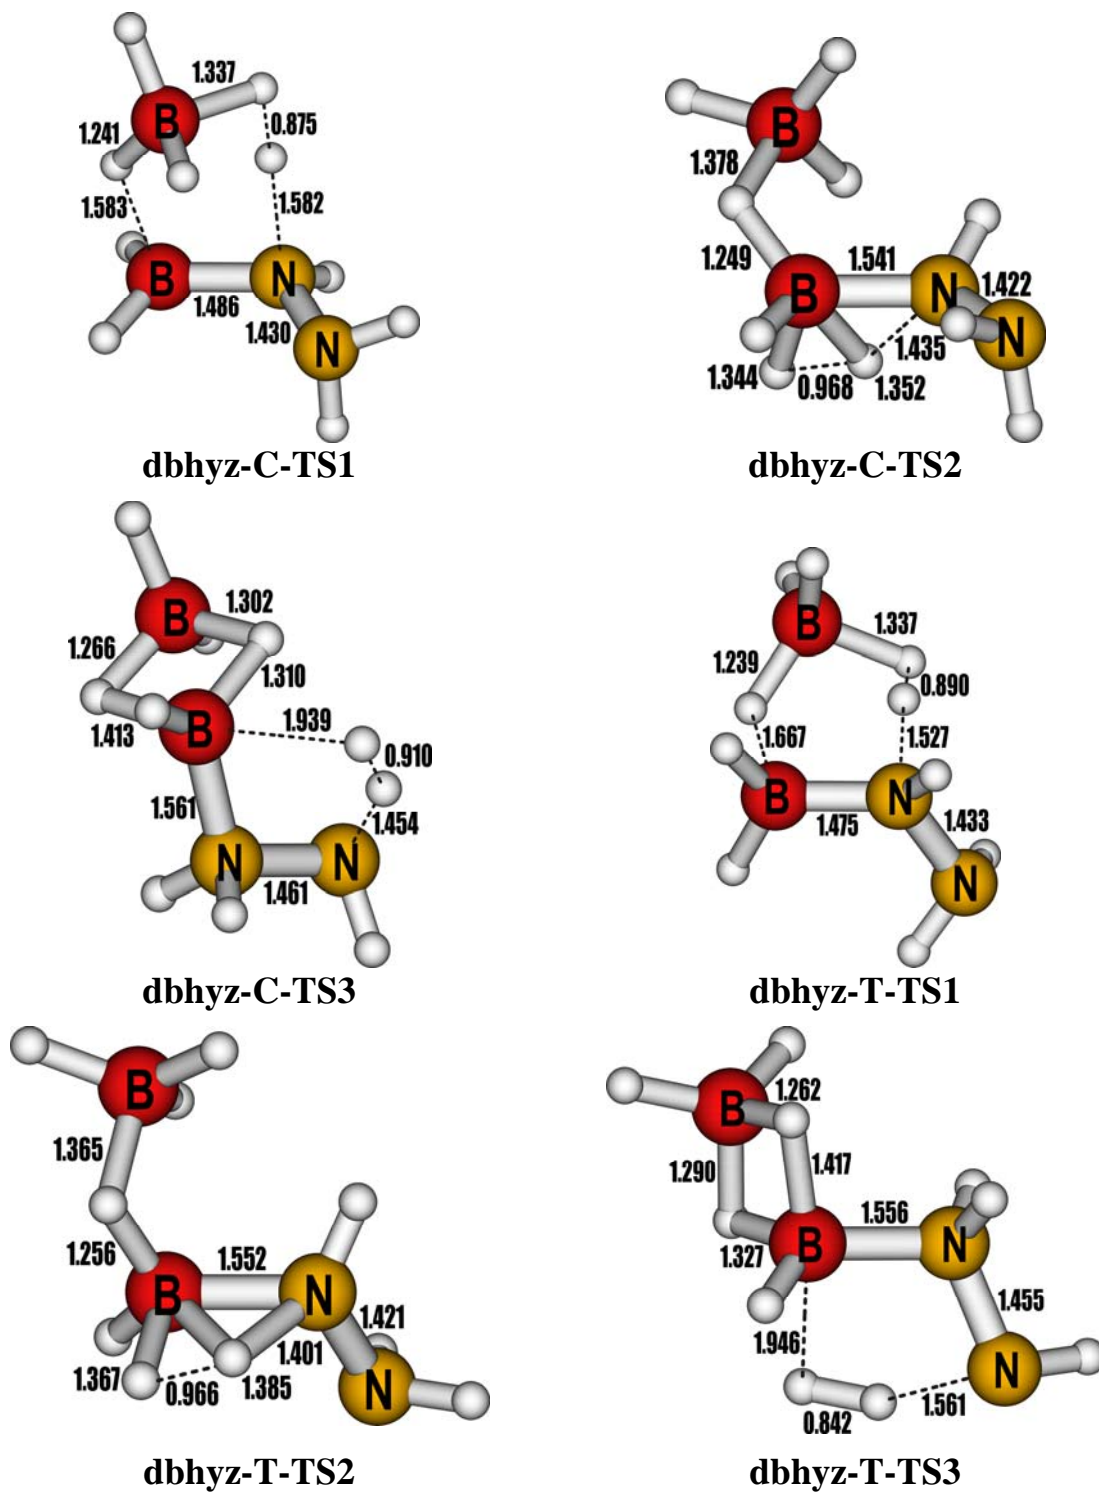

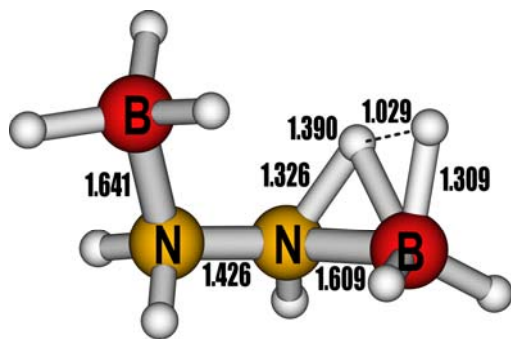

**bhyzb-TS1**

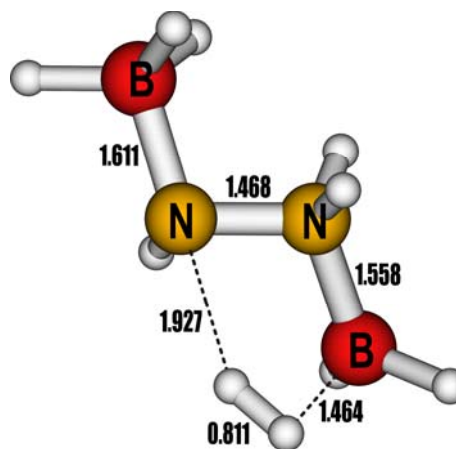

**bhyzb-TS2**
